# Supplementary material for: Wafer-scale and patternable synthesis of NbS2 for electrodes of organic transistors and logic gates
Source: Royal Society of Chemistry journal article supplement (doi:10.1039/c9tc02177a), 2019-01-01
Supplement: c9tc02177a1.pdf [file c9tc02177a1.pdf]

Supporting Information for

## Wafer-scale and Patternable Synthesis of NbS<sub>2</sub> for Electrodes of Organic Transistors and Logic Gates

Yongsuk Choi,<sup>#a</sup> Hunyoung Bark,<sup>#a</sup> Boseok Kang,<sup>a,b</sup> Myeongjae Lee,<sup>d</sup> BongSoo Kim,<sup>e</sup> Sungjoo Lee,<sup>a,b</sup> Changgu Lee,<sup>\*a,c</sup> Jeong Ho Cho<sup>\*f</sup>

<sup>a</sup>SKKU Advanced Institute of Nanotechnology (SAINT), <sup>b</sup>Department of Nano Engineering, <sup>c</sup>School of Mechanical Engineering, Sungkyunkwan University, Suwon 440-746, Republic of Korea.

<sup>d</sup>Department of Chemistry, Research Institute for Natural Sciences, Korea University, Seoul 02841, Republic of Korea.

<sup>e</sup>Department of Chemistry, Ulsan National Institute of Science and Technology (UNIST), Ulsan 44919, Republic of Korea

<sup>f</sup>Department of Chemical and Biomolecular Engineering, Yonsei University, Seoul 03722, Republic of Korea.

\*Corresponding authors: C. Lee ([peterlee@skku.edu](mailto:peterlee@skku.edu)) and J. H. Cho ([jhcho94@yonsei.ac.kr](mailto:jhcho94@yonsei.ac.kr))

<sup>#</sup>Y. Choi and H. Bark contributed equally to this work.

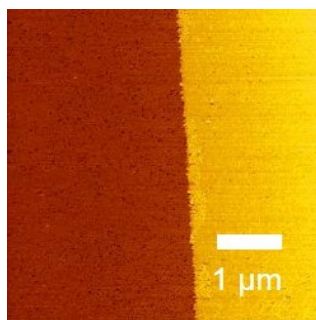

**Figure S1.** AFM image of NbS<sub>2</sub> film synthesized onto the SiO<sub>2</sub>/Si substrate was taken over 5 x 5 μm<sup>2</sup>.

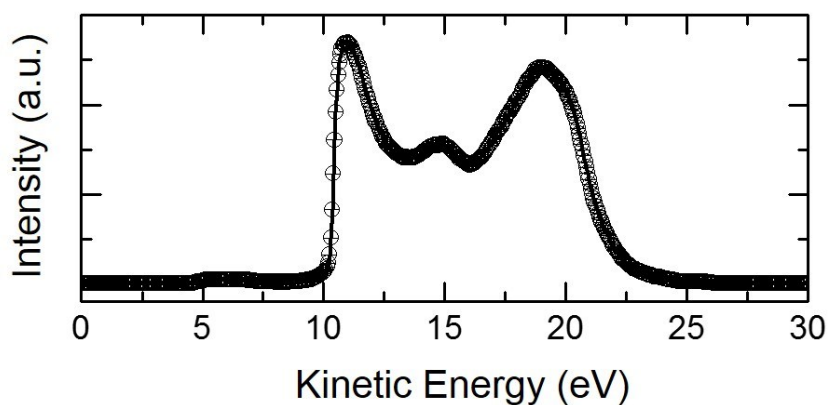

**Figure S2.** Ultraviolet photoelectron spectra of synthesized NbS<sub>2</sub> film. The work function was found to be 4.9 eV.

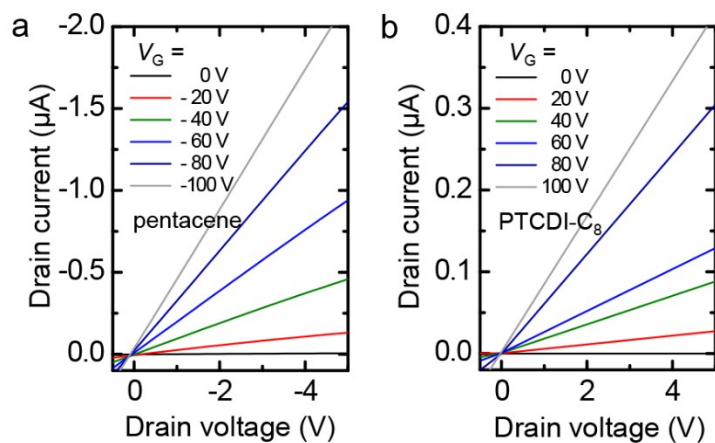

**Figure S3.** Linear plots of output curves of (a) pentacene and (b) PTCDI-C<sub>8</sub> OFETs with NbS<sub>2</sub>.

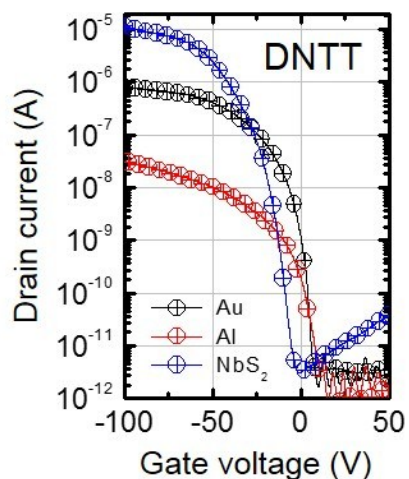

**Figure S4.** Comparison of transfer characteristics for DNTT FETs with Au, Al, and NbS<sub>2</sub> electrodes.

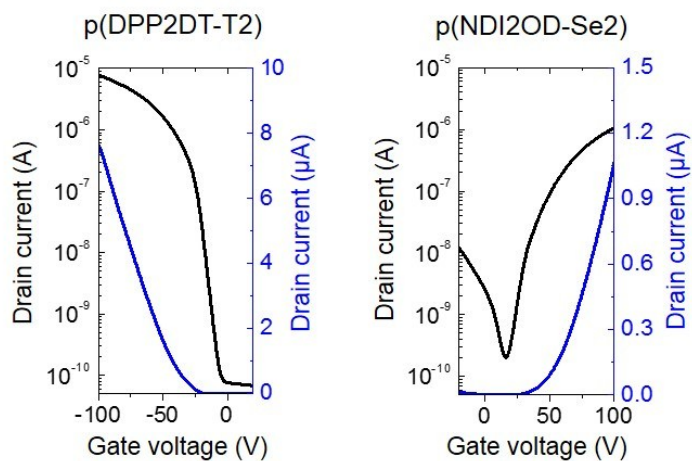

**Figure S5.** Transfer characteristics for p(DPP2DT-T2) FETs (left) and p(NDI2OD-Se2) FETs (right) with NbS<sub>2</sub> electrodes. The calculated carrier mobility was 0.087 Cm<sup>2</sup>/Vs for p(DPP2DT-T2) FETs and 0.013 Cm<sup>2</sup>/Vs for p(NDI2OD-Se2) FETs, respectively.

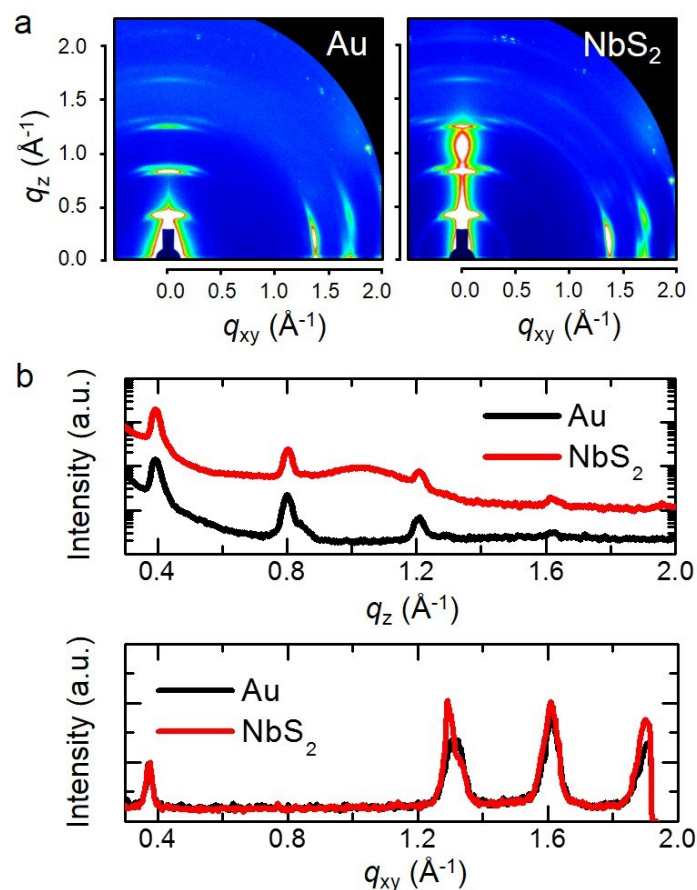

**Figure S6.** (a) 2D-GIXD patterns of DNTT films deposited on Au and NbS<sub>2</sub>. (b) 2D-GIXD line cuts of DNTT films deposited on Au (black line) and NbS<sub>2</sub> (red line). Cuts along the  $q_z$  direction (top) represent out-of-plane scattering, while the scattering in  $q_{xy}$  direction (bottom) comes from in-plane scattering.

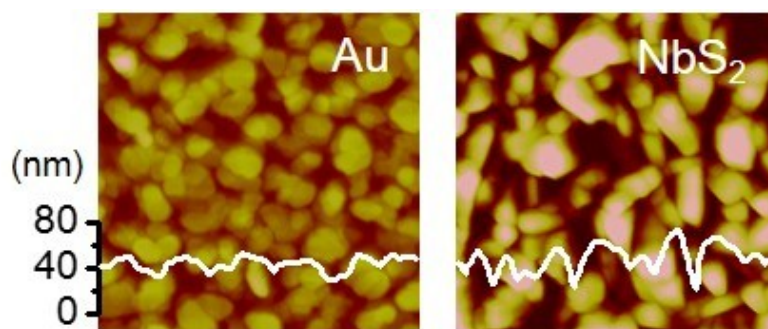

**Figure S7.** AFM images and cross-sectional profiles of DNTT films deposited on Au (left) and NbS<sub>2</sub> (right).
